# Supplementary material for: Pt-embedded-CeO2hollow spheres for enhancing CO oxidation performance
Source: Royal Society of Chemistry journal article supplement (doi:10.1039/c7qm00244k), 2017-01-01
Supplement: c7qm00244k1.pdf [file c7qm00244k1.pdf]

**Supporting Information**

**Pt-embedded-CeO<sub>2</sub> hollow spheres for enhancing CO oxidation performance**

Ke Wu,<sup>a</sup> Liang Zhou,<sup>a</sup> Chun-Jiang Jia,<sup>b</sup> Ling-Dong Sun<sup>a,\*</sup> and Chun-Hua Yan<sup>a,\*</sup>

<sup>a</sup>*Beijing National Laboratory for Molecular Sciences, State Key Laboratory of Rare Earth Materials Chemistry and Applications, PKU-HKU Joint Laboratory in Rare Earth Materials and Bioinorganic Chemistry, and College of Chemistry and Molecular Engineering, Peking University, Beijing 100871, China*

<sup>b</sup>*Key Laboratory for Colloid and Interface Chemistry, Key Laboratory of Special Aggregated Materials, School of Chemistry and Chemical Engineering, Shandong University, Jinan 250100, China*

*\*Corresponding author: sun@pku.edu.cn; yan@pku.edu.cn*

**Table S1.** Composition characterizations of Pt/CeO<sub>2</sub> HS composites, CeO<sub>2</sub> NS and supported Pt/CeO<sub>2</sub> NS reference catalysts.

| samples                | ICP-OES             | XPS           |                       |             |
|------------------------|---------------------|---------------|-----------------------|-------------|
|                        | Pt content / (wt %) | Ce(III) / (%) | O <sub>ad</sub> / (%) | Pt(0) / (%) |
| Pt/CeO <sub>2</sub> HS | 1.6                 | 41.7          | 41.2                  | 50.2        |
| CeO <sub>2</sub> NS    | –                   | 34.7          | 32.7                  | –           |
| Pt/CeO <sub>2</sub> NS | 1.7                 | 34.3          | 39.6                  | 10.3        |

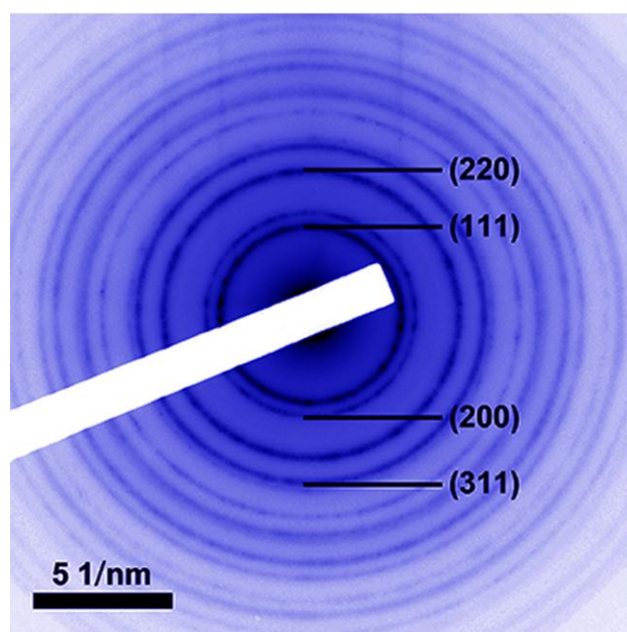

**Fig. S1.** The corresponding SAED image of Pt/CeO<sub>2</sub> HS composites.

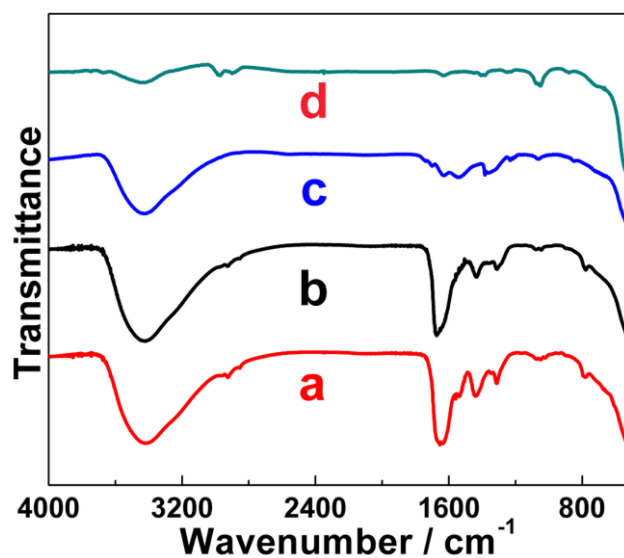

**Fig. S2.** FT-IR spectra of (a) CeO<sub>2</sub> NS before calcination; (b) as-synthesized Pt/CeO<sub>2</sub> HS composites before calcination; (c) calcined Pt/CeO<sub>2</sub> HS composites; (d) bulk CeO<sub>2</sub> powders.

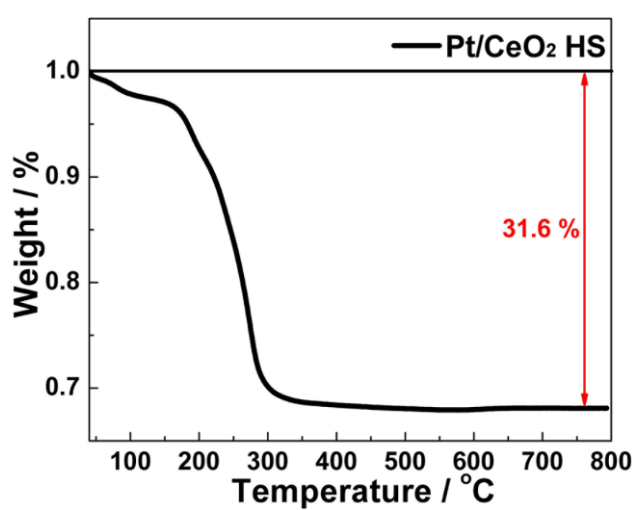

**Fig. S3.** Thermogravimetric curves for Pt/CeO<sub>2</sub> HS composites under air atmosphere, at a flow rate of 100 mL min<sup>-1</sup>.

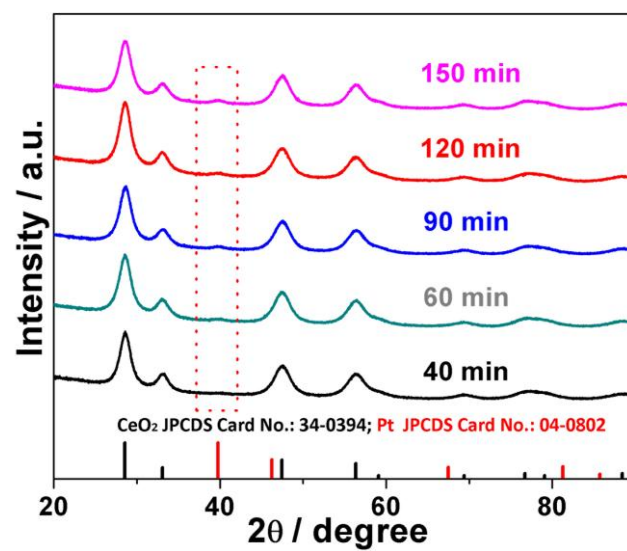

**Fig. S4.** XRD patterns of as-synthesized Pt/CeO<sub>2</sub> HS composites obtained at different growth stages from 40 min to 150 min during solvothermal reaction process.

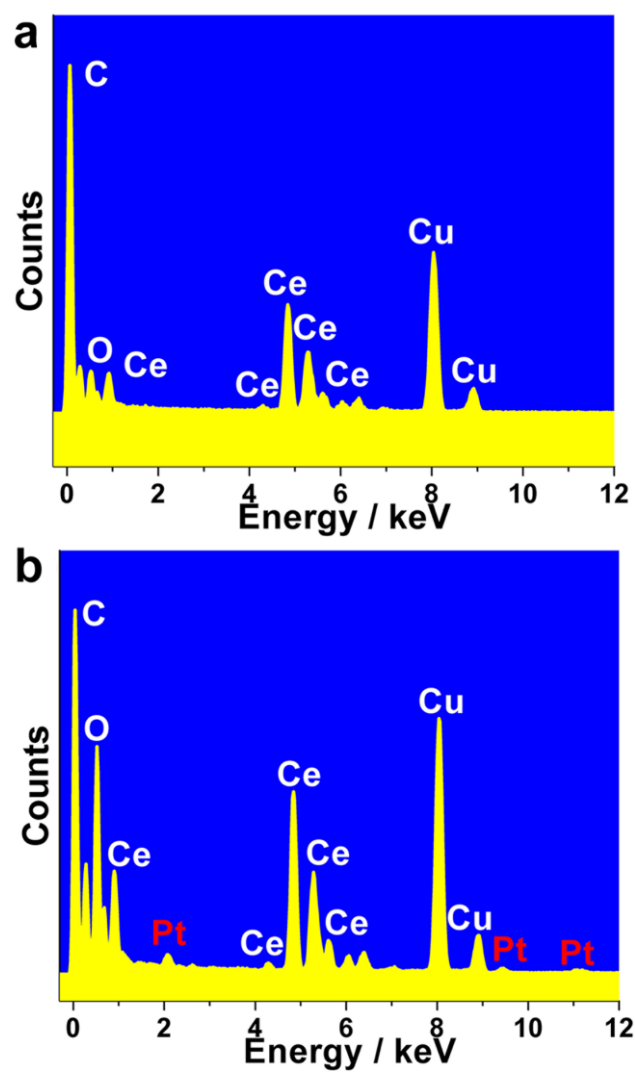

**Fig. S5.** EDS spectra of as-obtained Pt/CeO<sub>2</sub> HS composites synthesized at different growth stages: (a) 40 min; (b) 120 min.

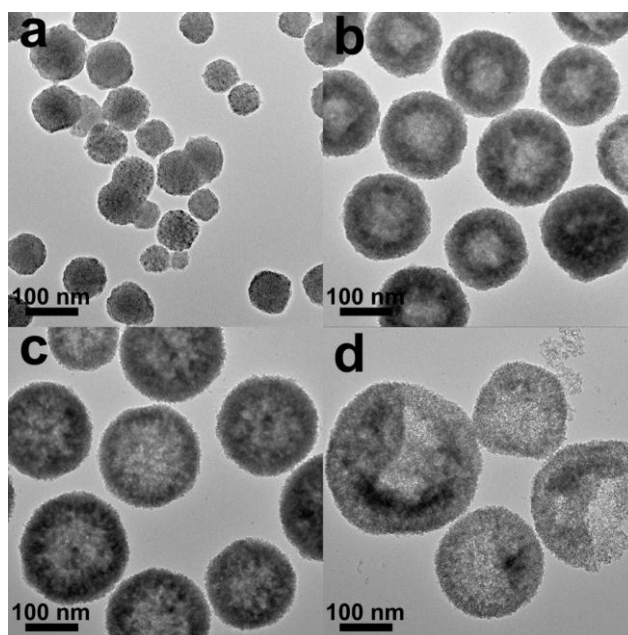

**Fig. S6.** TEM images of as-prepared Pt/CeO<sub>2</sub> HS composites obtained at different dosages of the acetic acid: (a) 0 ml; (b) 1.0 ml; (c) 1.5 ml; (d) 3.0 ml. Scale bar: 100 nm.

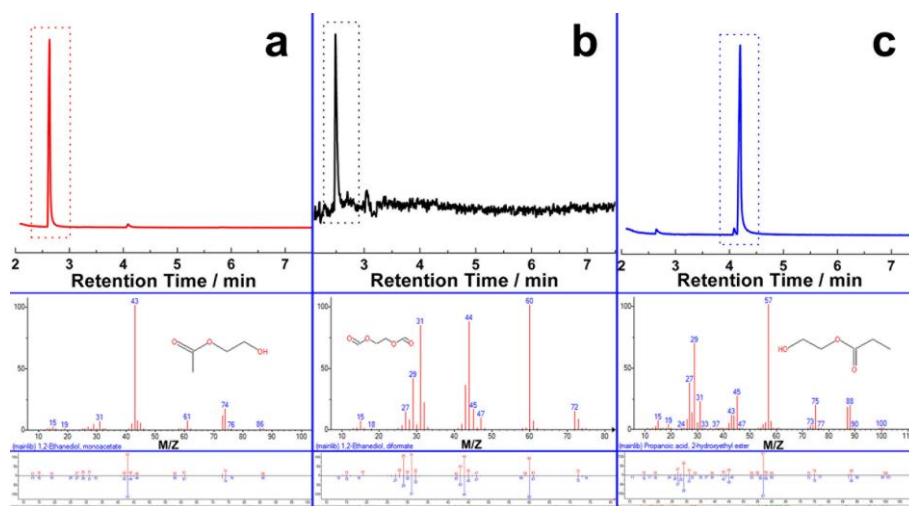

**Fig. S7.** GC-MS results of the different reaction media analytes: (a) 1,2-Ethanediol, monoacetate; (a) 1,2-Ethanediol, diformate; (c) Propanoic acid, 2-hydroxyethyl ester;

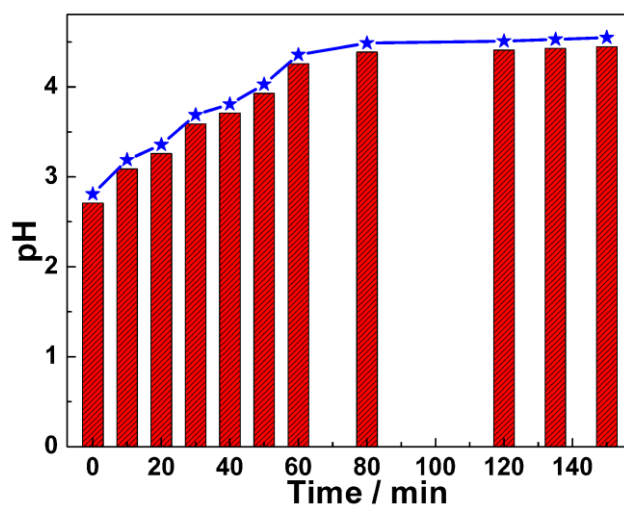

**Fig. S8.** The measured pH value of as-synthesized Pt/CeO<sub>2</sub> HS composites prepared at different growth stages from 0 min to 150 min during solvothermal reaction process.

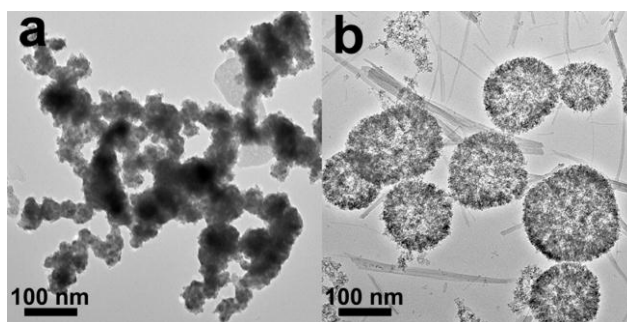

**Fig. S9.** TEM images of as-prepared Pt/CeO<sub>2</sub> HS composites obtained at different kinds of carboxylic acid: (a) formic acid, scale bar; (b) propionic acid. Scale bar: 100 nm.

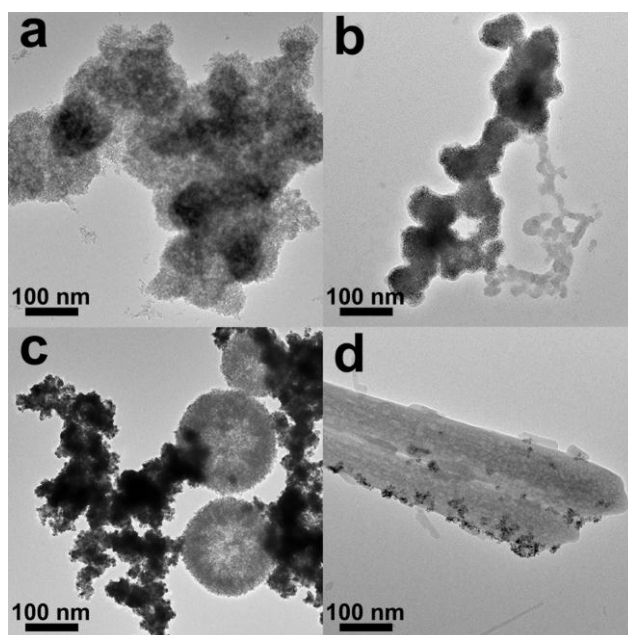

**Fig. S10.** TEM images of as-prepared products synthesized under the same condition for Pt/CeO<sub>2</sub> HS composites, except the use of (a) polyethylene glycol, (b) glycerol, (c) water, and (d) DMF to replace glycol, respectively. Scale bar: 100 nm.

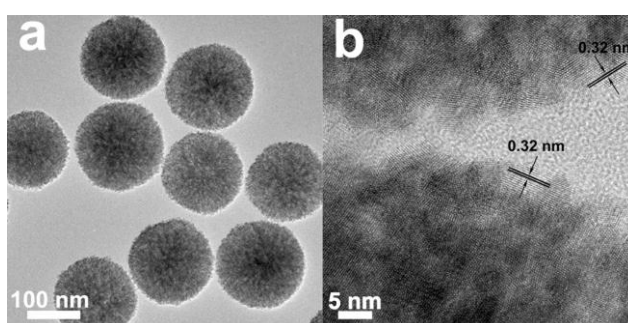

**Fig. S11.** TEM images of as-prepared CeO<sub>2</sub> NS synthesized under the same condition as for Pt/CeO<sub>2</sub> HS composites, except the exclusion of K<sub>2</sub>PtCl<sub>4</sub>: (a) low resolution TEM image with a scale bar of 100 nm. (b) High resolution TEM (HRTEM) image with a scale bar of 5 nm.



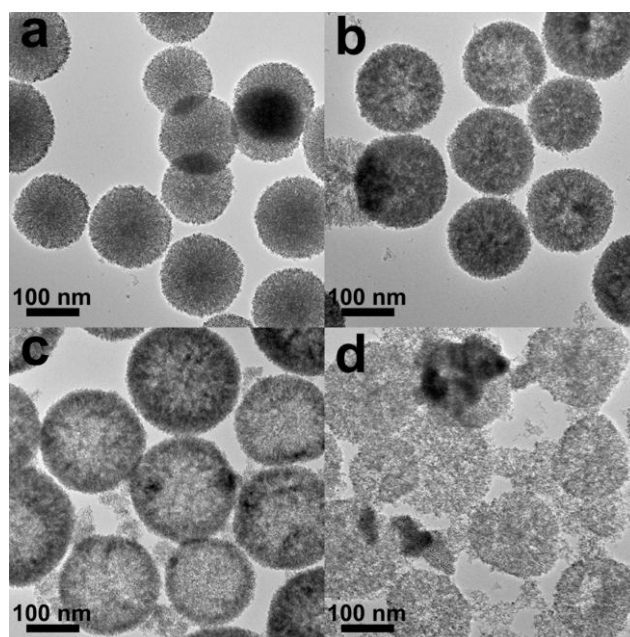

**Fig. S12.** TEM images of as-prepared products obtained at different contents of the K<sub>2</sub>PtCl<sub>4</sub> in the raw materials: (a) 0.5 wt%; (b) 1.0 wt%; (c) 2.0 wt%; (d) 3.0 wt%. Scale bar: 100 nm.

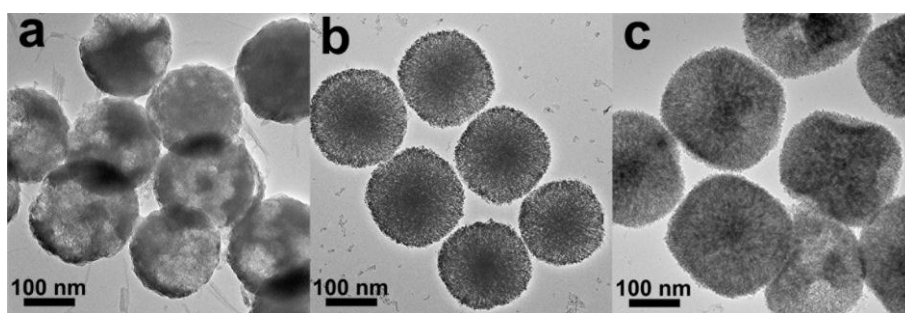

**Fig. S13.** TEM images of the as-prepared products obtained with the other kinds of noble metal precursors: (a) RhCl<sub>3</sub>; (b) H<sub>2</sub>PdCl<sub>4</sub>; (c) H<sub>2</sub>AuCl<sub>4</sub>. Scale bar: 100 nm.

**Table S2.** Comparison of the catalytic activities of Pt/CeO<sub>2</sub> HS composites for CO Oxidation with other reported noble metal/CeO<sub>2</sub> catalysts.

| Catalyst                                   | T <sub>100</sub> / °C | Ref       |
|--------------------------------------------|-----------------------|-----------|
| Pt/CeO <sub>2</sub> HS                     | 155                   | this work |
| Pt/CeO <sub>2</sub> NS reference catalysts | 186                   | this work |
| CeO <sub>2</sub> NS                        | 290                   | this work |
| Pt-Cu NPs                                  | 158                   | 7         |
| Au@CeO <sub>2</sub>                        | 155                   | 15        |
| Pt/ceria cubes                             | 160                   | 65        |
| Pt/La-Al <sub>2</sub> O <sub>3</sub>       | 250                   | 66        |
| hollow Pd-CeO <sub>2</sub>                 | 160                   | 67        |

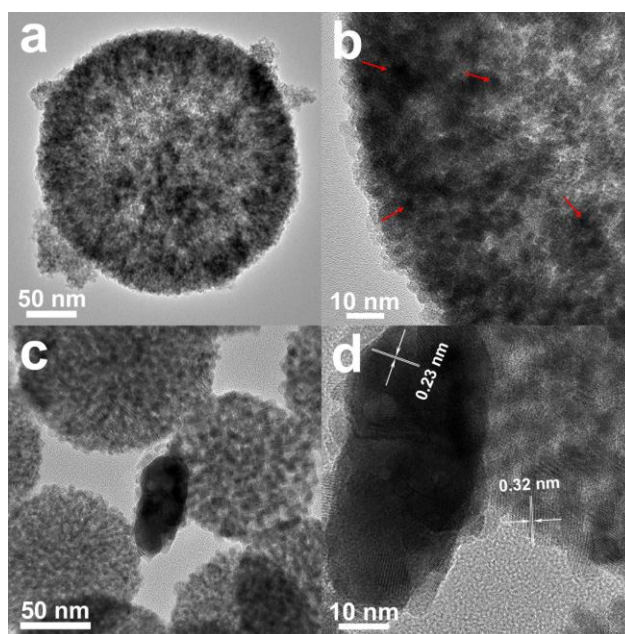

**Fig. S14.** (a-b) TEM images of the Pt/CeO<sub>2</sub> HS nanocomposite catalysts after the long-term stability test; (c-d) TEM images of the Pt/CeO<sub>2</sub> NS reference catalysts after the first cycle of CO oxidation reaction.

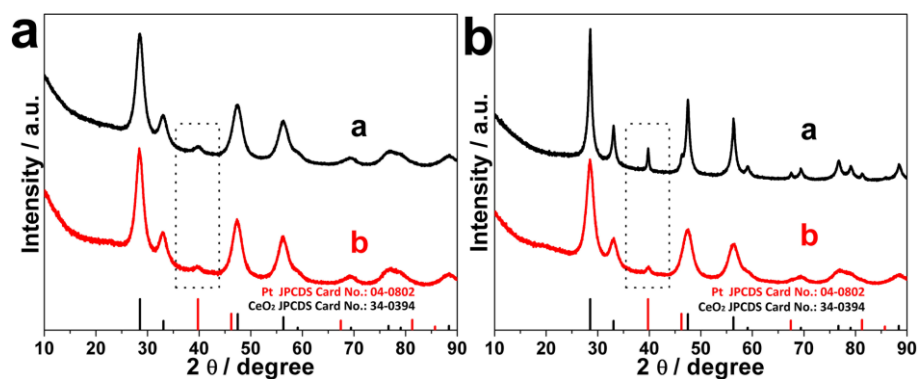

**Fig. S15.** (a) XRD patterns of Pt/CeO<sub>2</sub> HS composites: a) after the long-term stability test, b) before the long-term stability test; (b) XRD patterns of Pt/CeO<sub>2</sub> NS reference catalysts: a) after the first cycle of CO oxidation reaction, b) before the first cycle of CO oxidation reaction.

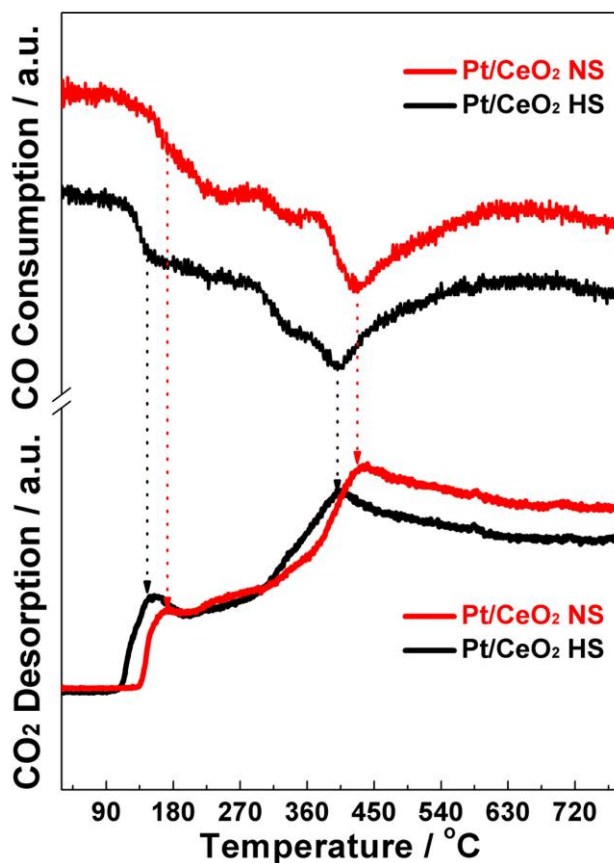

**Fig. S16.** CO-TPR profiles of Pt/CeO<sub>2</sub> HS composites and Pt/CeO<sub>2</sub> NS reference catalysts.
